# Supplementary material for: Different Impact of Perceptual Fluency and Schema Congruency on Sustainable Learning
Source: MDPI journal article supplement (doi:10.3390/su13137040), 2021-06-23
Supplement: s1 [file s1]

## Supplementary Materials

### Experiment 1

**Table S1.** Hits, false alarms and remember/know judgements, M = Mean, SD = Standard deviation.

|               | M    | SD   |
|---------------|------|------|
| Hits          | 0.69 | 0.46 |
| Fluent yes    | 0.77 | 0.18 |
| Remember      | 0.52 | 0.18 |
| Know          | 0.25 | 0.18 |
| Fluent no     | 0.61 | 0.22 |
| Remember      | 0.33 | 0.19 |
| Know          | 0.28 | 0.18 |
| Disfluent yes | 0.75 | 0.19 |
| Remember      | 0.48 | 0.18 |
| Know          | 0.27 | 0.18 |
| Disfluent no  | 0.62 | 0.21 |
| Remember      | 0.35 | 0.18 |
| Know          | 0.27 | 0.18 |
| False Alarms  | 0.22 | 0.11 |

# Different impact of perceptual fluency and schema congruency on sustainable learning

## Experiment 2

**Table S2** Hits, false alarms and remember/know judgements: (A) immediate test, (B) delayed test, M = Mean, SD = Standard deviation

**A**

| Immediate     |      |      |
|---------------|------|------|
|               | M    | SD   |
| Hits          | 0.63 | 0.17 |
| Fluent yes    | 0.66 | 0.23 |
| Remember      | 0.51 | 0.16 |
| Know          | 0.15 | 0.15 |
| Fluent no     | 0.63 | 0.25 |
| Remember      | 0.41 | 0.19 |
| Know          | 0.22 | 0.18 |
| Disfluent yes | 0.66 | 0.21 |
| Remember      | 0.46 | 0.16 |
| Know          | 0.20 | 0.16 |
| Disfluent no  | 0.53 | 0.26 |
| Remember      | 0.33 | 0.19 |
| Know          | 0.20 | 0.17 |
| False Alarms  | 0.19 | 0.13 |

**B**

| Delayed       |      |      |
|---------------|------|------|
|               | M    | SD   |
| Hits          | 0.46 | 0.22 |
| Fluent yes    | 0.48 | 0.23 |
| Remember      | 0.26 | 0.16 |
| Know          | 0.22 | 0.16 |
| Fluent no     | 0.43 | 0.25 |
| Remember      | 0.20 | 0.14 |
| Know          | 0.23 | 0.14 |
| Disfluent yes | 0.50 | 0.25 |
| Remember      | 0.30 | 0.15 |
| Know          | 0.20 | 0.15 |
| Disfluent no  | 0.42 | 0.25 |
| Remember      | 0.21 | 0.15 |
| Know          | 0.21 | 0.15 |
| False Alarms  | 0.22 | 0.14 |
